# Supplementary material for: Lycorine inhibits cell proliferation, migration and invasion, and primarily exerts in vitro cytostatic effects in human colorectal cancer via activating the ROS/p38 and AKT signaling pathways
Source: PubMed Central journal article supplement — Oncol Rep. 2021 Feb 5;45(4):19. doi: 10.3892/or.2021.7970 (PMC7879421; doi:10.3892/or.2021.7970), 2021-02-05
Supplement: Supplementary_Data.pdf [file Supplementary_Data.pdf]

Table SI. Primary and secondary antibodies used for western blotting.

| Antibody       | Supplier details                | Cat. no. | Dilution |
|----------------|---------------------------------|----------|----------|
| $\beta$ -actin | Zoonbio Biotechnology Co., Ltd. | ABM-0001 | 1:1,000  |
| AKT            | Cell Signaling Technology, Inc. | 9272     | 1:1,000  |
| Bad            | Cell Signaling Technology, Inc. | 9239     | 1:1,000  |
| Bax            | Cell Signaling Technology, Inc. | 2772     | 1:1,000  |
| Bcl-2          | Cell Signaling Technology, Inc. | 15071    | 1:1,000  |
| Caspase-3      | Cell Signaling Technology, Inc. | 9665     | 1:1,000  |
| CyclinB1       | Cell Signaling Technology, Inc. | 4135     | 1:1,000  |
| CyclinD1       | Cell Signaling Technology, Inc. | 2978     | 1:1,000  |
| CyclinE1       | Cell Signaling Technology, Inc. | 20808    | 1:1,000  |
| E-cadherin     | Cell Signaling Technology, Inc. | 14472    | 1:1,000  |
| MMP-2          | Cell Signaling Technology, Inc. | 13132    | 1:1,000  |
| MMP-7          | Cell Signaling Technology, Inc. | 3801     | 1:1,000  |
| MMP-9          | Cell Signaling Technology, Inc. | 13667    | 1:1,000  |
| N-cadherin     | Cell Signaling Technology, Inc. | 13116    | 1:1,000  |
| p-AKT (Ser473) | Cell Signaling Technology, Inc. | 9271     | 1:1,000  |
| p38            | Cell Signaling Technology, Inc. | 9212     | 1:1,000  |
| p-p38          | Cell Signaling Technology, Inc. | 4511     | 1:1,000  |
| p21            | Cell Signaling Technology, Inc. | 2947     | 1:1,000  |
| Smad4          | Cell Signaling Technology, Inc. | 38454    | 1:1,000  |
| Snail          | Cell Signaling Technology, Inc. | 3895     | 1:1,000  |
| Vimentin       | Cell Signaling Technology, Inc. | 5741     | 1:1,000  |
| Anti-mouse     | OriGene Technologies, Inc.      | ZB-2305  | 1:5,000  |
| Anti-rabbit    | OriGene Technologies, Inc.      | ZB-2301  | 1:5,000  |

MMP, matrix metalloproteinase; p, phosphorylated; Snail, snail family transcriptional repressor 1.
